# Supplementary material for: Effect and Mechanism of Pitch Coating on the Rate Performance Improvement of Lithium-Ion Batteries
Source: MDPI journal article supplement (doi:10.3390/ma15134713), 2022-07-05
Supplement: s1 [file s1]

**Table S1.** The content of the pitch calculated using the density difference.

|                | True density<br>(g/ml) | *Pitch contents<br>(%) |
|----------------|------------------------|------------------------|
| FG             | 2.310                  | 0                      |
| CFG5           | 2.289                  | 4.10                   |
| CFG10          | 2.274                  | 7.03                   |
| CFG15          | 2.265                  | 8.92                   |
| CFG20          | 2.245                  | 13.00                  |
| Pitch (900 °C) | 1.810                  | 100                    |

\* [density of FG - density of samples]/[density of FG - density of pitch (900 °C)]

**Table. S2.** Elemental analysis of coating pitch.

|        | Carbon | Hydrogen | Nitrogen | Sulfur |
|--------|--------|----------|----------|--------|
| Raw    | 93.39  | 5.45     | 0.012    | 0.090  |
| 900 °C | 96.48  | 0.69     | 0.077    | 0.059  |

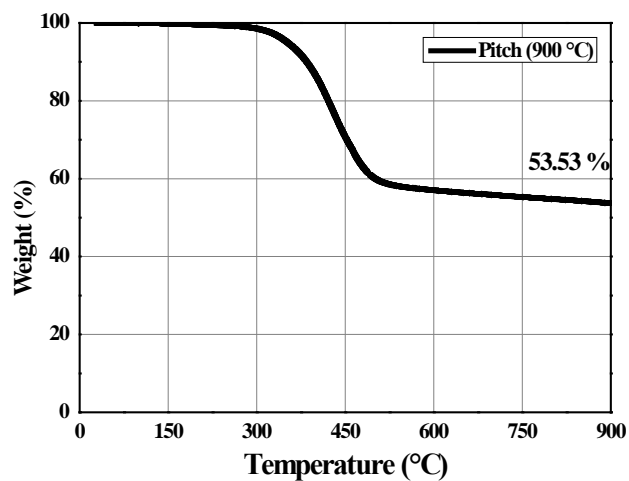

**Figure S1.** Thermal behavior of coating pitch in N<sub>2</sub> atmosphere.

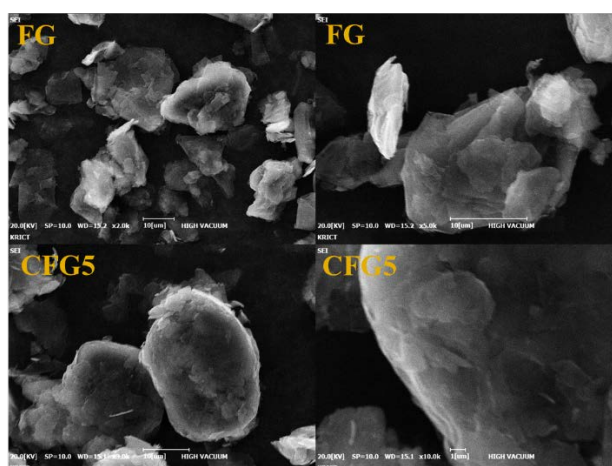

**Figure S2.** SEM images of FG and CFG5.

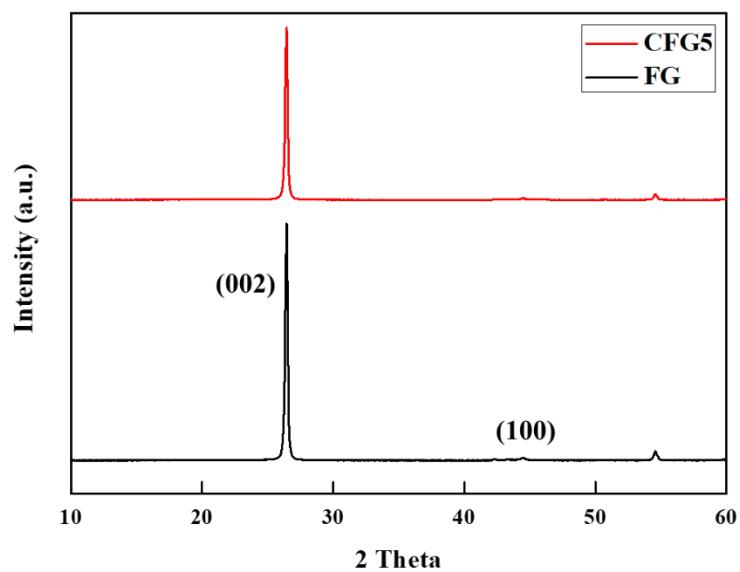

**Figure S3.** XRD of FG and CFG5.

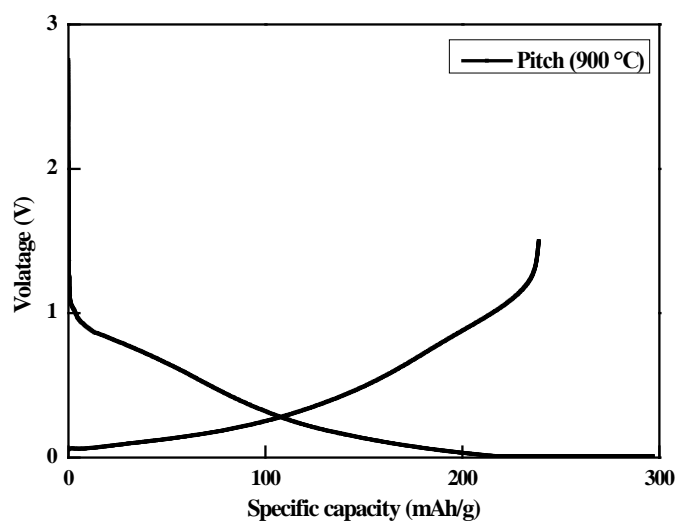

**Figure S4.** Galvanostatic charge/discharge (GDC) of pyrolyzed pitch at the first cycle.

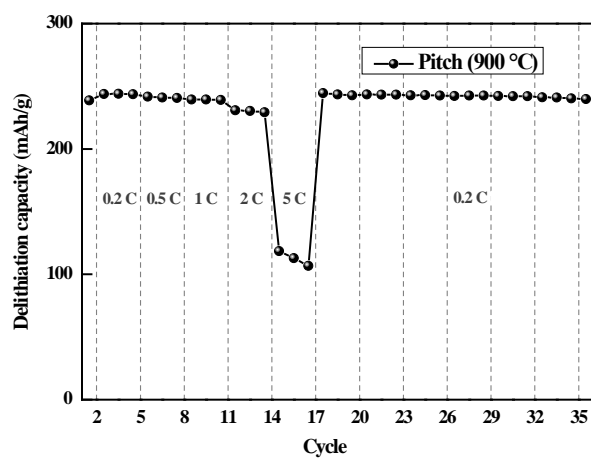

**Figure S5.** Rate performance at various delithiation rates of pyrolyzed pitch and cycling stability.

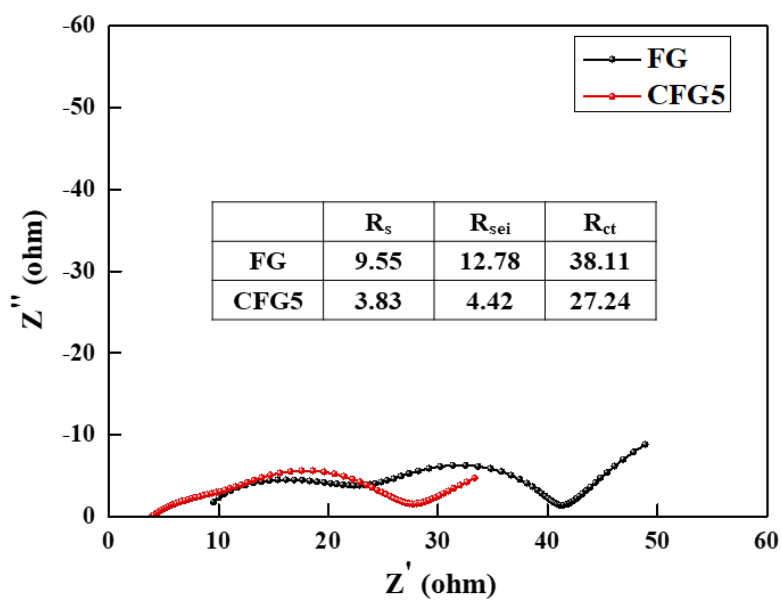

**Figure S6.** EIS curves after cycling of FG and CFG5.

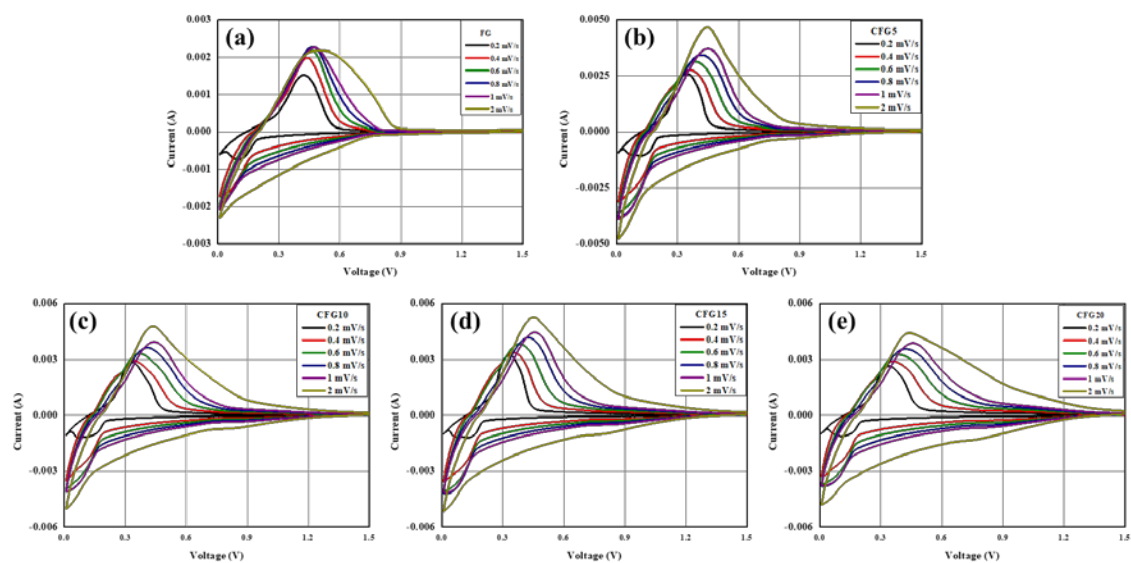

**Figure S7.** Cyclic voltammograms at different scan rates of (a) FG, (b) CFG5, (c) CFG10, (d) CFG15, and CFG20.

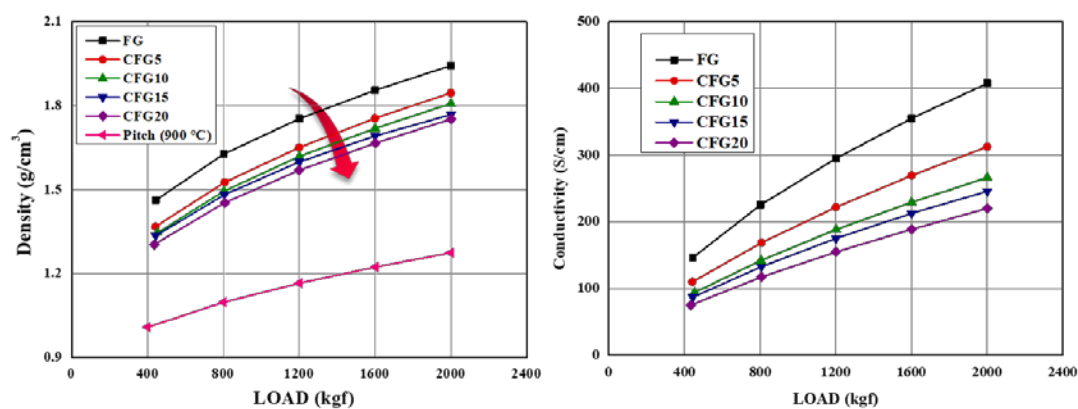

**Figure S8.** Influence of (a) density and (b) electronic conductivity as a load (kgf).

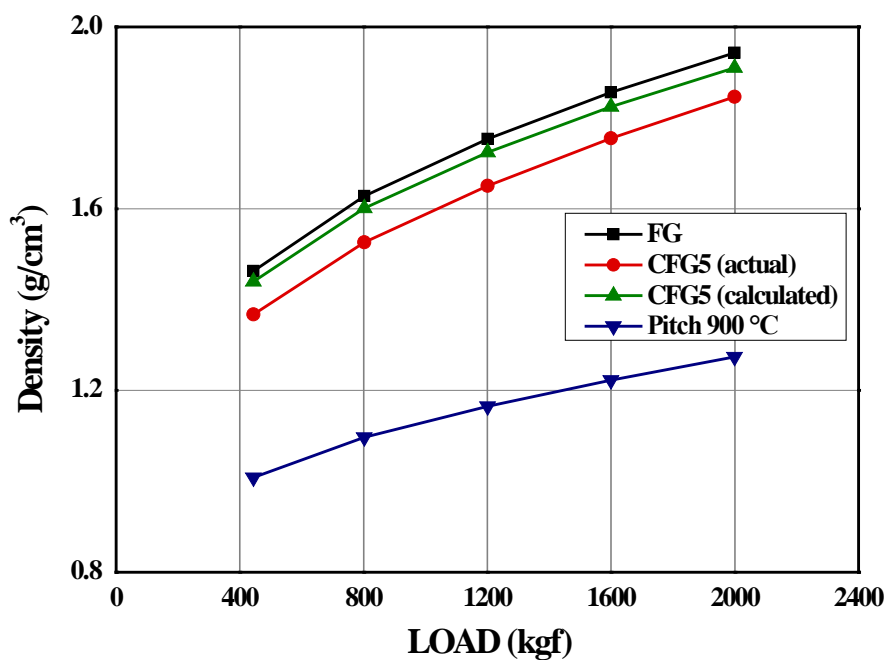

**Figure S9.** Actual density and the calculated density of CFG5 and actual density of FG and pyrolyzed pitch according to the load.

**Table. S3.** Actual density and the calculated density according to the load.

| LOAD<br>(kgf) | Packing density (g/cm <sup>3</sup> ) |                                  |                 |                     |                 |                     |                 |                     |
|---------------|--------------------------------------|----------------------------------|-----------------|---------------------|-----------------|---------------------|-----------------|---------------------|
|               | CFG5                                 |                                  | CFG10           |                     | CFG15           |                     | CFG20           |                     |
|               | Actual<br>value <sup>a</sup>         | Calculated<br>value <sup>b</sup> | Actual<br>value | Calculated<br>value | Actual<br>value | Calculated<br>value | Actual<br>value | Calculated<br>value |
| 400           | 1.367                                | 1.440                            | 1.346           | 1.417               | 1.335           | 1.394               | 1.304           | 1.372               |
| 800           | 1.526                                | 1.601                            | 1.495           | 1.575               | 1.482           | 1.548               | 1.453           | 1.522               |
| 1200          | 1.651                                | 1.724                            | 1.619           | 1.695               | 1.599           | 1.666               | 1.569           | 1.636               |
| 1600          | 1.755                                | 1.824                            | 1.719           | 1.793               | 1.692           | 1.761               | 1.666           | 1.729               |
| 2000          | 1.846                                | 1.910                            | 1.808           | 1.876               | 1.769           | 1.843               | 1.752           | 1.809               |

<sup>a</sup>Actual value was measured using a powder resistivity measurement system.

<sup>b</sup>Calculated value was estimated by the equation (density of FG at Load) x (weight percent of FG) + (density of Pitch at Load) x (weight percent of pitch).
